# Supplementary material
Source: PubMed Central journal article supplement (PMC2730354)

**Supplementary Figure 1. Recruitment of lysosomal and Golgi plasma membrane repair in *Mtb* infected human Mφ.** (a) Mannosidase II translocation to the surface of Mφ let uninfected or infected with H37Ra or H37Rv (MOI ~ 5 or 10). Kinetics of mannosidase II (b) and LAMP1 (c) translocation to the surface of human Mφ infected with H37Ra or H37Rv (MOI ~ 10). (d) Translocation of Syt-7 to the surface of Mφ infected for 12 h with H37Ra or H37Rv (MOI ~ 10). Shaded histogram indicates staining of uninfected human Mφ. Each panel is representative of 3-6 independent donors.

**Supplementary Figure 2. Quantitation of mannosidase II, LAMP1, and annexin-1 total protein in uninfected and infected Mφ.** (a) Immunoblot analysis of mannosidase II, LAMP1, annexin-1 and β-actin total protein accumulation in uninfected, H37Ra and H37Rv infected human Mφ (MOI ~ 10) 24 h after infection. (b) Cell extracts were from whole human Mφ uninfected and infected with H37Ra or H37Rv (MOI 10, 24 h) immunoblot for LAMP1 at 10.0, 5.0 and 2.5 μg of total protein per lane, respectively. Lower panel indicates the ratio of LAMP1 to β-actin for each lane (c) LAMP1 Immunoblot analysis of whole-cell extracts of infected (H37Rv MOI 10:1, 24 h) or uninfected Mφ from the indicated mice. Graph indicates the ratio of LAMP1 to β-actin. (d) Total LAMP1 in *Alox5<sup>-/-</sup>*, *Ptges<sup>-/-</sup>*, and wild-type Mφ was analyzed by flow cytometry. After 24 h, uninfected or infected (H37Rv MOI 10:1) murine Mφ were permeabilized and stained with anti-LAMP1 according to the manufacturer's instructions. Graph indicates the quantification of the mean fluorescence intensity (MFI) in each group. Red histogram is the unstained control and the black histogram indicates the specific LAMP1 staining. Each panel is representative of 2-3 experiments.

**Supplementary Figure 3. Intracellular pools of LAMP1.** *Alox5<sup>-/-</sup>*, *Ptges<sup>-/-</sup>*, and wild-type Mφ were infected with virulent H37Rv (MOI 10:1) for 24h. Infected and uninfected wild-

type control M $\phi$  were permeabilized with methanol (5 min, 100%, -20° C). Permeabilized cells were stained with a monoclonal antibody against the luminal domain of LAMP1. Scale bar 5  $\mu$ m. Experiment was repeated twice.

# Supplementary Figure 1

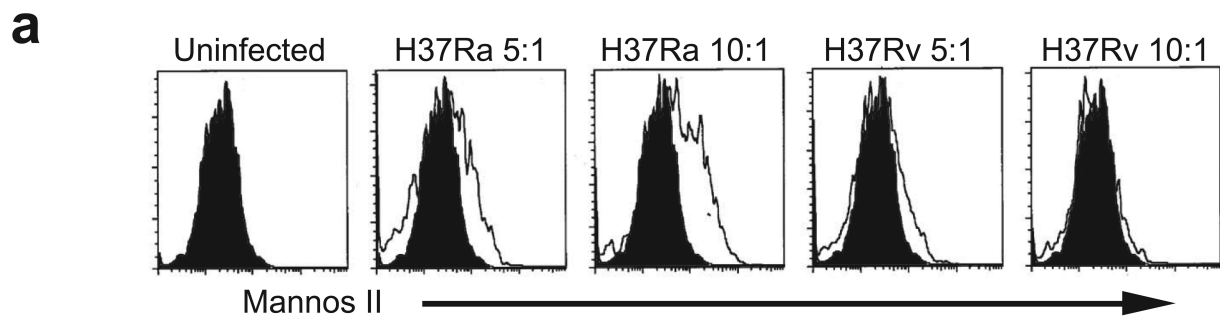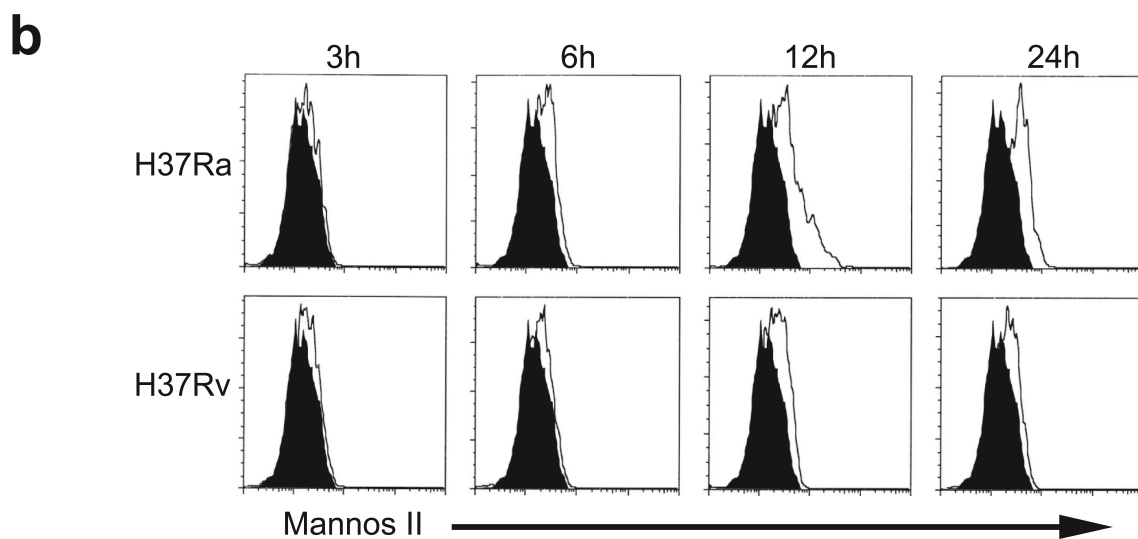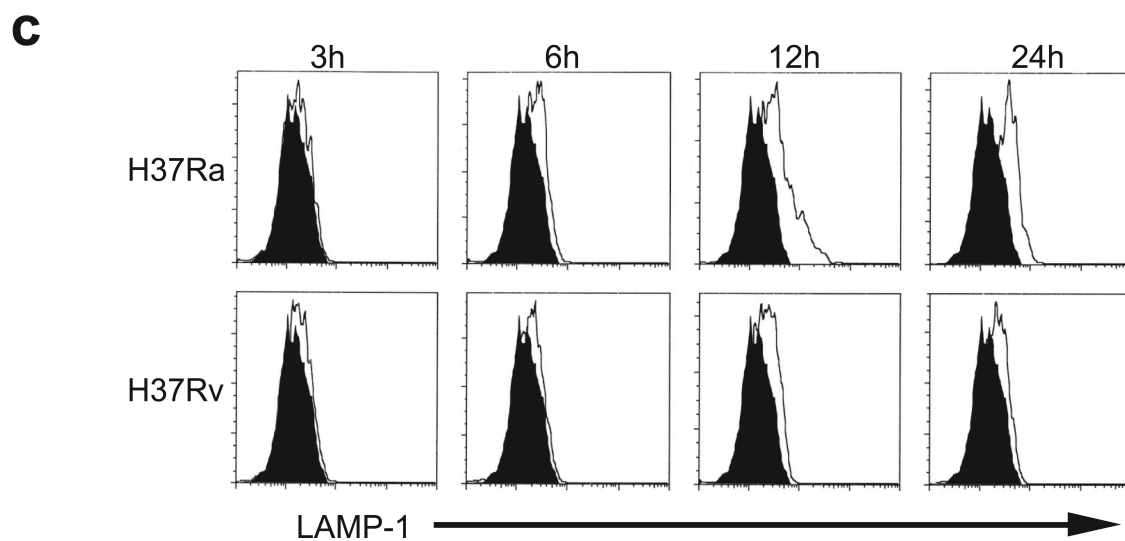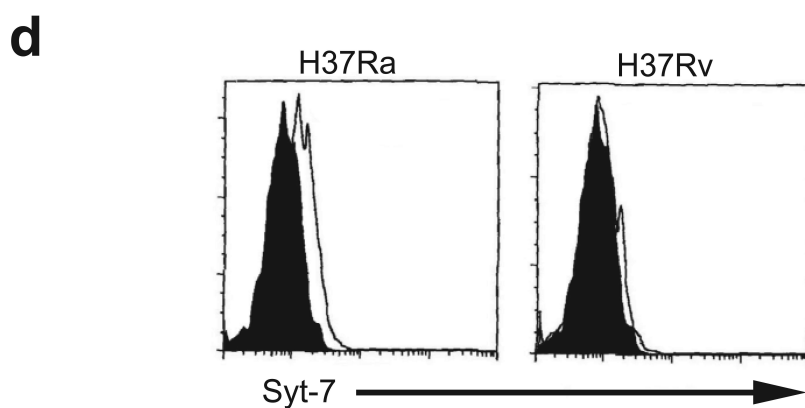

# Supplementary Figure 2

**a**

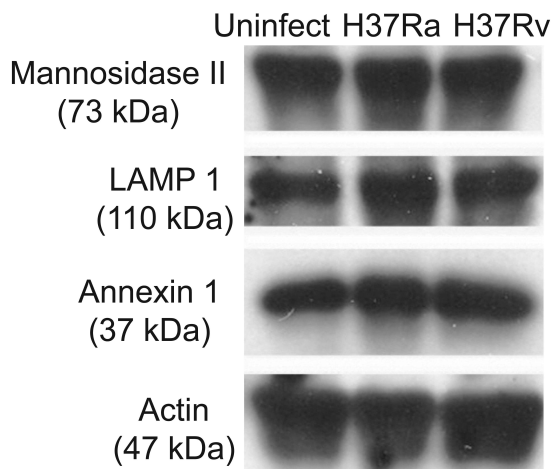

**b**

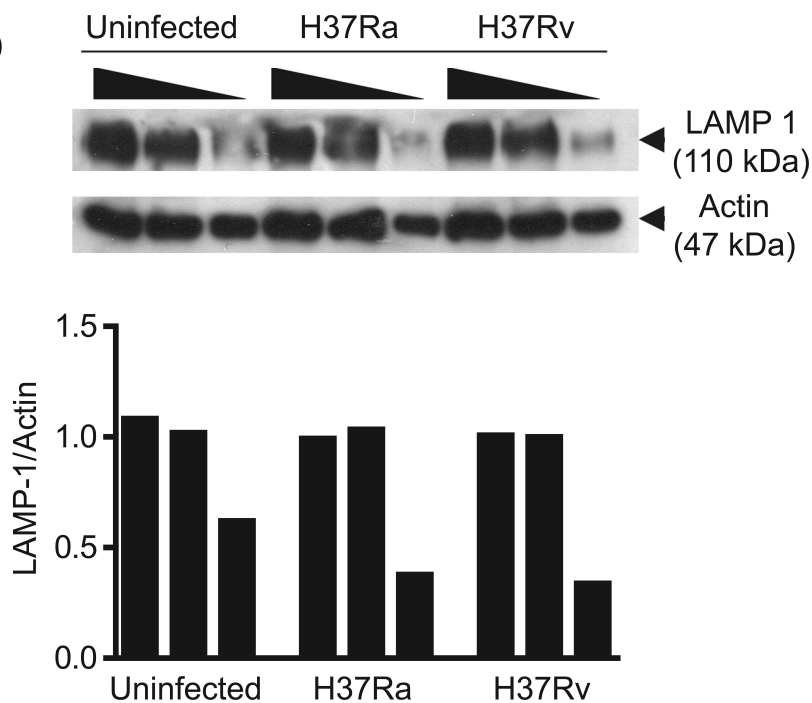

**c**

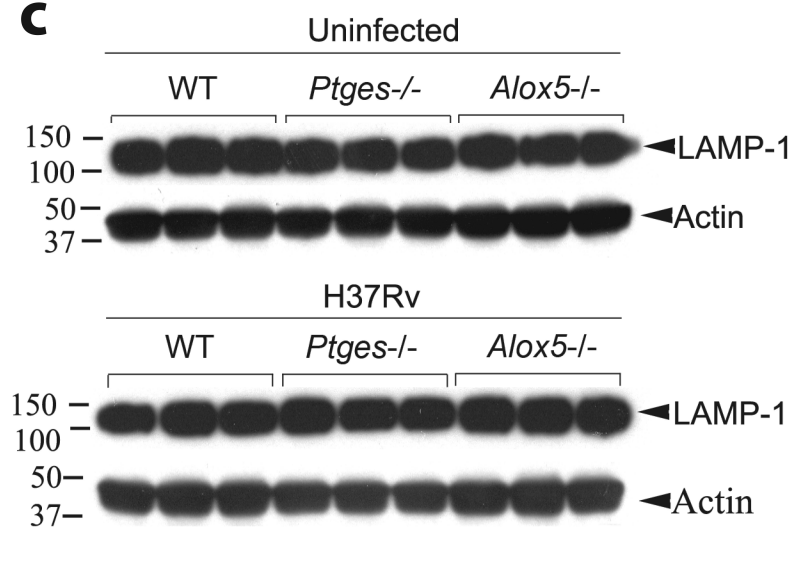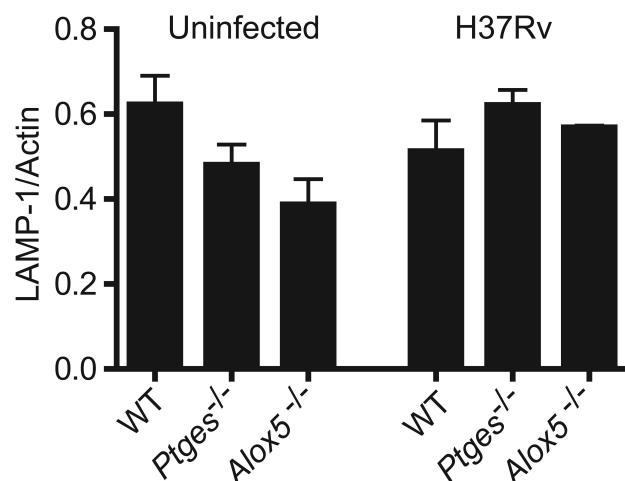

**d**

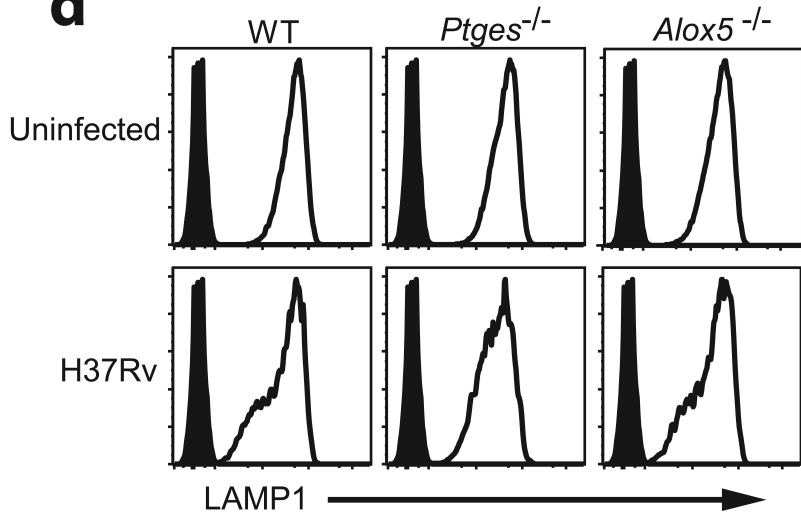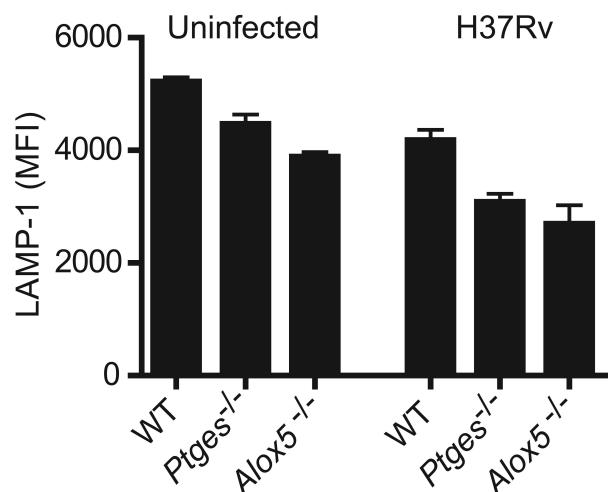

## Supplementary Figure 3

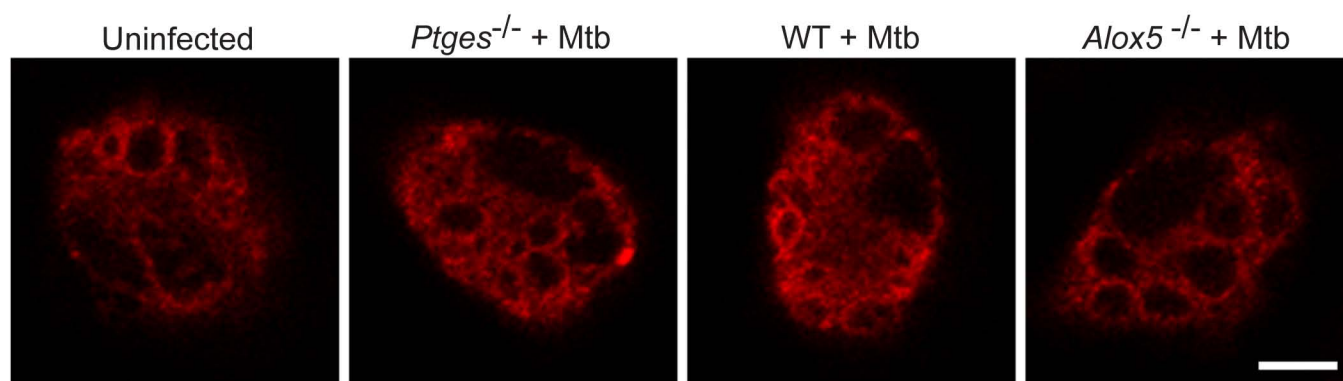

Supplement: NIHMS119668-supplement-1.pdf [file NIHMS119668-supplement-1.pdf]
